# Supplementary material
Source: PubMed Central journal article supplement (PMC547886)
Supplement: pnas_102_5_1339__1.pdf [file pnas_102_5_1339__1.pdf]

## Discovery

MCF-7 cells + E2

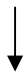

Sonicated chromatin

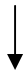

Anti-SRC-3 ChIP

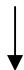

Precipitated DNA

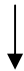

~40 bp-tag library  
concatemers

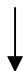

Genomic locations  
identify clusters

## Query

MCF-7 cells + E2

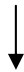

Sonicated chromatin

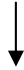

Anti-SRC-3 or -ER $\alpha$  ChIP

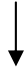

Precipitated DNA

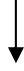

Confirm SRC-3 or ER $\alpha$   
binding at cluster location  
by Q-PCR
